# Supplementary material
Source: Springer Nature journal article supplement (https://www.springermedizin.de/resource/supplementary/13017_2013_292_MOESM5_ESM.pdf/9635876)

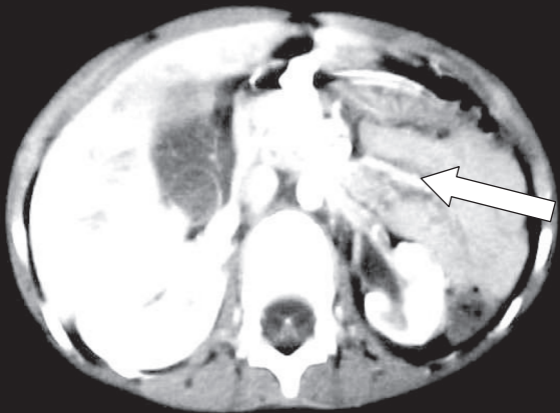

Supplement: MOESM5 [file 9635876]
